# Supplementary material for: Mechanics of rolling of nanoribbon on tube and sphere
Source: Royal Society of Chemistry journal article supplement (doi:10.1039/c3nr00489a), 2013-01-01
Supplement: c3nr00489a.pdf [file c3nr00489a.pdf]

# Mechanics of rolling of nanoribbon on tube and sphere

(Supplementary Information)

Qifang Yin, Xinghua Shi\*

LNM, Institute of Mechanics, Chinese Academy of Sciences, Beijing 100190

\*[shixh@imech.ac.cn](mailto:shixh@imech.ac.cn)

To verify if the torsional energy of GNR has contribution to the total energy, we performed MD simulation with a GNR winding onto a tube in helix form. The GNR with 87.048 angstrom in length and 12.564 angstrom in width is chosen to interact with an infinitely long CNT with a radius of 5.388 angstrom (SFig. 1). We marked  $\alpha$  as the angle between helical direction and the axis of the CNT and  $h$  as the distance of the two farthest ends of the GNR. Changing  $h$  would lead to the change of the torsional energy. SFig. 1 shows the relationship of the potential energy per atom of the ribbon against  $h$ . The difference between the maximum and the minimum is 0.0015 eV per atom which is 0.02% of the potential energy (~6.95 eV per atom). So we ignored the influence of torsional energy in our model.

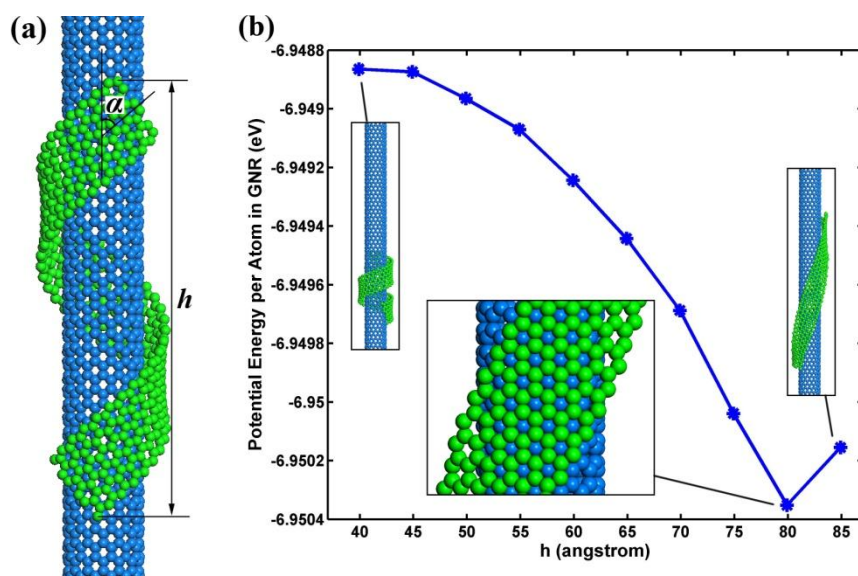

SFig. 1 The relationship of the total potential energy of GNR with the parameter  $h$ .
